1 Adam M. Ćmiel<sup>1</sup>, Bogdan Ćmiel<sup>2</sup>

2 <sup>1</sup> Institute of Nature Conservation, Polish Academy of Sciences, al. A. Mickiewicza 33, 31-120

3 Kraków, Poland

4 <sup>2</sup> Faculty of Applied Mathematics, AGH University of Science and Technology, al. A. Mickiewicza

5 30, 30-059 Kraków, Poland

6

7 corresponding author: [cmiel@iop.krakow.pl](mailto:cmiel@iop.krakow.pl)

8

9 **A new, simple method of describing COVID-19 trajectory and dynamics in any country based**  
10 **on Johnson Cumulative Distribution Function fitting.**

11

12 **Abstract**

13 This paper present simple method to study and to compare the infection dynamics between countries  
14 based on curve fitting to the publicly shared data of COVID-19 confirmed infections reported by  
15 them. Presented method was tested using data from 80 countries from 6 regions. We found that  
16 Johnson Cumulative Distribution Functions (CDF) are extremely well fitted to the data ( $R^2 > 0.99$ ) and  
17 that Johnson CDF is much better fitted to the data at its tails than both commonly used Normal and  
18 Lognormal CDF. Fitted Johnson CDFs can be used to obtain basic parameters of the infection wave,  
19 such as the percentage of the population infected during the infection wave, day of the start, peak and  
20 the end of the infection wave, as well as the duration of the infections wave and the duration of the  
21 wave increase and decrease. These parameters may be easily biologically interpreted and used both in  
22 describing the infection wave dynamics and in further statistical analysis. The usefulness of the  
23 obtained parameters was demonstrated on two examples: the analysis of the relation of the Gross  
24 Domestic Product (GDP) per capita and the analysis of the population density on the percentage of the  
25 population infected during infection wave, the day of the start, and the duration of the infection wave  
26 in analyzed countries. We found that all of the abovementioned parameters were significantly  
27 dependent on the GDP per capita, while only the percentage of population infected was significantly  
28 dependent on the population density in analyzed countries. Also, if used with caution, presented  
29 method has some limited ability to predict the future trajectory and parameters of the ongoing  
30 infection wave.

31

32 **Introduction**

33 COVID-19 is a highly contagious disease, caused by the SARS-CoV-2 coronavirus. The virus was  
34 first detected in Wuhan (Central China) in December 2019, but as early as mid January, the virus  
35 quickly spread throughout China. On 13 January 2020, the first case outside China was confirmed and  
36 on 24 January, the first case in Europe was reported. In the second half of February 2020, outbreaks  
37 with hundreds of cases erupted in South Korea, Italy and Iran (Skórka et al., 2020) and COVID-19

38 was declared as a pandemic by the World Health Organization on March 11, 2020 (Ducharme,  
39 2020). To date, globally, over 64 million infections and almost 1.5 million death cases were reported  
40 (WHO, 2020).

41 Since the very beginning of the pandemic, many models have been proposed to understand the  
42 outbreak dynamics of COVID-19 (e.g. IHME, 2020; UGSDSC, 2020; LANL, 2020; Ferguson et al.,  
43 2020; Kissler et al., 2020; Aleta et al.; Hellewell et al., 2020) and were used by policymakers (e.g. US  
44 Government) to allocate resources or plan interventions. Some of them, such as early IHME model  
45 received fair amount of criticism (Jewell et al., 2020). COVID-19 modelling studies generally follow  
46 one of two general approaches: forecasting models and mechanistic models; although there are hybrid  
47 approaches (Holmdahl and Buckee, 2020). Forecasting models are often statistical in nature, fitting a  
48 line or curve to data and extrapolating from there, without incorporating the process that produces the  
49 pattern (Holmdahl and Buckee, 2020), while mechanistic models simulate the outbreak through  
50 interacting disease mechanisms by using local nonlinear population dynamics and global mixing of  
51 populations (Hethcote, 2000). Purely statistic models are reliable only within a short time window and  
52 may be useful to make rapid short-term recommendations, whereas mechanistic modelling can be  
53 useful to explore how the pandemic would change under various assumptions and political  
54 interventions (Kuhl, 2020).

55 Since its beginning, COVID-19 pandemic generated huge amount of data and probably is the  
56 best documented disease in history. New cases, active cases, death cases, number of tests performed  
57 data are usually daily published by official sources (e.g. governments), gathered and publicly shared as  
58 freely accessible datasets (e.g. Hasell, et al. 2020). This makes a possibility for researchers to focus on  
59 analyzing the pandemic and its dynamics also in other fields than epidemiology. However,  
60 abovementioned models provide many pandemic parameters, useful in predicting different scenarios  
61 of future infections, day, probability and duration of future pandemic peaks, which is extremely useful  
62 for policymakers in planning interventions, however they may not be very useful in other fields than  
63 epidemiology. Thus the urgent need of developing methods of describing the trajectory of pandemic  
64 waves arose. Such methods should be easy to apply, and should provide parameters describing  
65 trajectory and dynamics of the epidemic, which are easy to interpret and to use in further statistical  
66 analysis by researchers from other fields (e.g. sociology, biology, ecology, etc.) which can deepen our  
67 understanding of the COVID-19 pandemic.

68 The aim of this paper is to present a new simple method based on curve fitting to the reported  
69 data on confirmed cases of infection, to study and compare the infection dynamics between countries  
70 (or regions). The method is based on the Johnson Cumulative Distribution Function (CDF) fitting, and  
71 was tested using data from 80 countries from 6 regions (Africa, Asia, Europe, Oceania and both North  
72 and South America). Also, Johnson CDFs were used to calculate basic parameters of the infection  
73 wave dynamics, such as the percentage of the population infected during the infection wave, day of the  
74 start, peak and end of the infection wave, as well as the duration of the infections wave and the

75 duration of the wave increase and decrease. This parameters are easy to interpret and may be used in  
76 further statistical analysis of epidemic dynamics, which was demonstrated on the examples of the  
77 influence of Global Domestic Product (GDP) per capita and the influence of population density on the  
78 percentage of infections and the day of the start and the duration of the first infection wave in  
79 analyzed countries. Both the presented method and techniques employed are all straightforward and  
80 well known and the purpose of the paper is to illustrate how simple techniques can be used to solve  
81 otherwise difficult problems, such as description of the epidemic wave.

82

### 83 **Materials and methods**

84 The data used in this study was obtained from Our World in Data COVID-19 dataset (Hasell, et al.  
85 2020) from December 2019 to 19 November 2020. Presented method was tested on 80 countries from  
86 6 Regions: 1) Africa (Democratic Republic of Congo, Egypt, Ethiopia, Kenya, Morocco, Nigeria,  
87 Somalia, South Africa, South Sudan, Sudan and Zimbabwe), 2) Asia(Afghanistan, Bangladesh,  
88 Cambodia, China, India, Indonesia, Iran, Iraq, Israel, Japan, Lebanon, Myanmar, Pakistan, Philippines,  
89 Saudi Arabia, Singapore, South Korea, Sri Lanka, Syria, Taiwan, Thailand, Turkey, Vietnam), 3)  
90 Europe (Austria, Belgium, Bosnia and Herzegovina, Bulgaria, Croatia, Cyprus, Czechia, Finland,  
91 France, Germany, Greece, Hungary, Ireland, Italy, Netherlands, North Macedonia, Norway, Poland,  
92 Portugal, Romania, Russia, Serbia, Slovakia, Slovenia, Spain, Sweden, Switzerland, Ukraine, United  
93 Kingdom), 4) North America (Canada, Jamaica, United States of Mexico, United States of America)  
94 5) Oceania (Australia, Fiji, New Zealand, Papua New Guinea), and 6) South America (Argentina,  
95 Bolivia, Brasil, Chile, Colombia, Paraguay, Peru, Uruguay, Venezuela).

96 In order to make the data comparable between countries, for each country, number of  
97 infections in each day of the pandemic, was standardized, and were presented as a percentage of the  
98 population of a given country infected (number of confirmed infections in a given country/country  
99 population\*100%). Also, a five-days moving average was calculated using percentage of infections to  
100 smooth the data and to minimize the effect of lower number of tests performed and lower number of  
101 confirmed infections during some short periods (e.g. weekends).This makes the loss function more  
102 regular i.e. it has less relative extrema, which makes it easier to find global extremum. Nevertheless,  
103 all presented  $R^2$  for obtained Johnson CDFs are calculated using raw (not smoothed) data.

104

### 105 **Fitting Johnson CDF by moments**

106 Johnson (1949) described a system of frequency curves that represents transformations of the standard  
107 normal curve (detailed description in Hahn and Shapiro, 1967). Applying these transformations to a  
108 standard normal variable allows a unique distribution to be derived for whatever combination of mean,  
109 standard deviation, skewness, and kurtosis occurs for a given set of observed data. The standard  
110 method of fitting Johnson curves is to use four coefficients defining a Johnson distribution: two shape  
111 ( $\gamma$ ,  $\delta$ ), a location ( $\xi$ ), and a scale ( $\lambda$ ) coefficient:

112 
$$F(x) = \Phi(\gamma + \delta \sinh^{-1}(\frac{x-\xi}{\lambda})) \quad (1)$$

113 ,where  $\Phi$  is cumulative distribution function of standard normal distribution. However, this method is  
114 not intuitive (i.e. it is difficult to set starting points from the data to perform numerical fitting). Thus  
115 alternative method for fitting Johnson curves, using first four moments (mean, variance, skewness and  
116 kurtosis) of an empirical distribution was selected (detailed description in Hahn and Shapiro,1967 and  
117 Hill et al.,1976).All statistical fits in the paper were performed using the Levenberg-Marquardt  
118 algorithm (Moré, 1978) to solve the corresponding non-linear least square optimization problem.  
119 Convergence criterion was set to  $1.0E^{-10}$ .

120

### 121 **Fitting Johnson CDF to the epidemic waves**

122 There is no strict definition for what is or is not an epidemic wave or phase. The intuitive definition of  
123 the pandemic wave traces the development of an epidemic over time and/or space. During an epidemic  
124 the number of new infected cases increases (often rapidly) to a peak and then falls (usually more  
125 gradually) until the epidemic wave is over.

126 The epidemic dynamics may highly differ between countries. Since the beginning of the  
127 pandemic, in some countries only one epidemic wave was observed (e.g. Afghanistan, Argentina), in  
128 some countries two epidemic waves were observed (e.g. Australia), while in others even more  
129 epidemic waves were observed, which also may overlap and interfere each other (e.g. Croatia, where  
130 four overlapping and interfering waves were observed). Also, in many countries, a range of various  
131 levels of the lockdown were applied to slow down or "flatten" the infection curve, the epidemic waves  
132 may not follow the Farr's law (which states that epidemics tend to rise and fall in a roughly  
133 symmetrical pattern or bell-shaped curve) and may be asymmetrical.

134 The basic assumption is that each epidemic wave  $W$  in a given country may be described by a  
135 five parameters scaled Johnson CDF: scale parameter ( $s$ ), and abovementioned moments: expected  
136 value (mean;  $E$ ), variance ( $V$ ), skewness ( $S$ ) and kurtosis ( $K$ )

137 
$$W(t)=s*F_{E,V,S,K}(t) \quad (1)$$

138 , where  $t$  is the time measured since the day of the beginning of the pandemic and function  $F_{E,V,S,K}$  is  
139 Johnson CDF with parameters  $\gamma, \delta, \xi, \lambda$  assuring mean, variance, skewness and kurtosis equal to  
140  $E, V, S, K$  respectively (see Hahn and Shapiro,1967; Hill et al.,1976). The  $S$  and  $K$  parameters were  
141 expected to improve the curve fit at the tails of the epidemic wave in case it was not symmetrical or  
142 heavy tailed.

143

### 144 **Obtaining basic epidemic wave parameters and their biological interpretation**

145 Once the Johnson CDFs were fitted to each pandemic wave in a given country, basic parameters  
146 obtaining the wave dynamics: (1) 2.5% quantile ( $Q_{2.5\%}$ ), (2) 50% quantile (median;  $Q_{50\%}$ ), (3) 97.5%  
147 quantile ( $Q_{97.5\%}$ ) were calculated:

148 
$$Q_{2.5\%} = F_{E,V,S,K}^{-1}(2.5\%) \quad (2)$$

149 
$$Q_{50\%} = F_{E,V,S,K}^{-1}(50\%) \quad (3)$$

150 
$$Q_{97.5\%} = F_{E,V,S,K}^{-1}(97.5\%) \quad (4)$$

151 The disadvantage of fitting Johnson curve by its moments is that it is not possible to  
152 determinate its mode analytically. Thus the mode of each Johnson CDF was determined numerically:

153 
$$M = \arg \max f_{E,V,S,K}(x) \quad (5)$$

154 , where  $f_{E,V,S,K}$  is Johnson Probability Density Function (PDF).

155 The obtained parameters have an intuitive biological interpretation (Fig. 1): the scale parameter ( $s$ )  
156 indicate the total percentage of infections during a given epidemic wave ( $P_{inf}$ ),  $Q_{2.5\%}$  indicate the day  
157 when infection wave starts, while  $Q_{97.5\%}$  indicate its end. Median ( $Q_{50\%}$ ) indicate the day when the half  
158 of the total percentage of infected during a given wave was reached. Finally, the mode ( $M$ ) indicate the  
159 day of the peak occurrence. Additionally, one can easily obtain the wave duration ( $T$ )

160 
$$T = Q_{97.5\%} - Q_{2.5\%} \quad (5)$$

161 the duration of wave increase ( $t_i$ )

162 
$$t_i = M - Q_{2.5\%} \quad (6)$$

163 and the duration of the wave decrease ( $t_d$ )

164 
$$t_d = Q_{97.5\%} - M \quad (7)$$

165 Also, the parameter measuring the asymmetry of the infection wave ( $A$ ) can be easily obtained as a  
166 ratio

167 
$$A = t_i / t_d \quad (8)$$

168 All of the abovementioned parameters may be easily used in further statistical analysis, which  
169 was shown on examples: 1) the relationship between Gross Domestic Product (GDP) per capita and  
170 basic parameters describing the dynamics of the first wave of infections:  $M$ ,  $T$ , and  $P_{inf}$ , and 2) the  
171 relation between population density and basic parameters describing the dynamics of the first wave of  
172 infections:  $M$ ,  $T$ , and  $P_{inf}$ . Only first wave of infections in each country was taken into account,  
173 because in some countries, second (and consecutive) waves were not observed, and they would have  
174 been excluded from the analysis.

175

## 176 **Comparing curves: Johnson vs Normal and Lognormal CDF**

177 The differences between Johnson, Normal and Lognormal CDF were presented on the data from  
178 Afghanistan, where only one epidemic wave was observed. The differences were shown by comparing  
179 the  $R^2$ ,  $P_{inf}$ ,  $Q_{2.5\%}$ ,  $M$ , and  $Q_{97.5\%}$  parameters. Both 2.5% and 97.5% quantiles for normal and lognormal  
180 distributions, were obtained using inverse Normal and inverse Lognormal PDF respectively.

181

## 182 **Fitting Johnson CDF to the ongoing wave and possibility of prognosis**

183 Fitting Johnsons curve to the ongoing wave result in obtaining parameters, which can also be  
184 interpreted as a prognosis of the future shape and dynamics of infection wave. In such case,  $P_{inf}$ ,  $M$  and  
185  $Q_{97.5\%}$  indicate predicted percentage of infections, predicted day of the peak and predicted day of the  
186 end of the ongoing wave respectively, which also can be used to calculate predicted time of increase,  
187 decrease and duration of the ongoing infection wave. Because presented method is intended to  
188 describe infection dynamics rather than predicting its future outcome, the accuracy of the prognosis  
189 was presented only on the data on the first wave of infection observed in the United Kingdom in the  
190 Supplementary Materials.

191

## 192 **Examples of application**

### 193 **The relation between Gross Domestic Product (GDP) per capita and the relation between** 194 **population density and the dynamics of the first wave of COVID-19 infections**

195 The data on the GDP per capita and population density in 80 analyzed countries were obtained from  
196 Our World in Data COVID-19 dataset (Hasell, et al. 2020).

197 The relationship between GDP per capita and the relation between population density and  
198 basic parameters describing the dynamics of the first wave of infections ( $M$ ,  $T$ , and  $P_{inf}$ ) obtained using  
199 presented method of Johnson CDF fitting was tested using the quantile dependence function method,  
200 which was described in detail in Ćmiel and Ledwina (2020). This method was designed for measuring,  
201 visualizing the dependence structure, and testing of independence of two random variables. It exploits  
202 a recently introduced local dependence measure (quantile dependence function  $q$ ), which gives a  
203 detailed picture of the underlying dependence structure and provides a means to carefully examine the  
204 local association structure at different quantile levels (Ćmiel and Ledwina 2020).

205

## 206 **Results**

207 The examples of fitted Johnson curves to the data from countries where one ongoing infection wave  
208 (Argentina), one infection wave (Afghanistan), two infection waves (Australia) and four overlapping  
209 and interfering infection waves (Croatia) were observed was presented at Fig. 2. Fitted four Johnson  
210 CDFs to the four waves of infections observed in Croatia, with areas where waves are overlapping and  
211 interfering was presented in detail at Fig. 3A.

212 Johnson CDF fitting tested using data obtained from 80 different countries showed that all  
213 curves were extremely well fitted: the lowest  $R^2$  obtained was 0.995 (Fiji), while the highest  $R^2$  was  
214 0.99997 (Iraq), while the mean and median  $R^2$  was 0.9995 and 0.9997 respectively. Fitted functions  
215 with  $R^2$  and COVID-19 trajectory plots with fitted functions for each country were presented the  
216 Supplementary Materials (Table S1; Figure S1-S6).

217 Fitting Johnson, Normal and Lognormal distribution curves to the single wave of infection  
218 observed in Afghanistan showed, that the best fitted was the Johnson CDF ( $R^2=0.9998$ ), while both  
219 Normal ( $R^2=0.9980$ ) and Lognormal ( $R^2=0.9989$ ) distributions were worse fitted, mainly at the tails of



220 the infection wave (Fig. 3B). Obtained parameters  $Q_{2.5\%}$ ,  $M$ ,  $Q_{97.5\%}$  for the infections wave in  
221 Afghanistan using Johnson CDF fitting were 59, 100, 209 respectively, while the same parameters  
222 obtained using Normal CDF fitting and Lognormal CDF fitting were 57, 105, 152 and 65, 98,167  
223 respectively. Percent of confirmed population infected during the infection wave obtained using scale  
224 parameters ( $s$ ) of fitted Johnson, Normal and Lognormal distributions were 0.1028%, 0.0984% and  
225 0.0997% respectively.

226 Among analyzed countries, 17 (21.3%) countries were described by fitting one wave of  
227 infections, 35 (43.8%) countries were described by fitting two waves of infections, 24 (30%)  
228 countries were described by fitting three waves of infections and 4 (5%) countries were described by  
229 fitting four waves of infections (Table S1).

230 The basic statistics for the obtained skewness parameters of Johnson distributions fitted to the  
231 first pandemic waves in 80 analyzed counties showed, that in majority of them, the first wave of  
232 infection was skewed (median  $S=1.5$ ; minimum  $S=0$ ; maximum  $S=141.5$ ). First wave of infection was  
233 symmetrical in 16 countries (20%;  $A < 1.05$ ). Also, basic statistics for parameter  $A$  showed, that time of  
234 wave decreasing is longer than time of wave increase (mean  $A=4.7$ ; median  $A=2.9$ ; minimum  $A=1.0$ ;  
235 maximum  $A=22.4$ ).

236 The results of the analysis of the associations between GDP per capita and  $M$ ,  $T$  and  $P_{inf}$   
237 parameters showed, that the percentage of confirmed infections during the first epidemic wave in  
238 analyzed countries was dependent on the GDP per capita ( $p=0.0147$ ; Fig 4A), as well as the time of  
239 the peak occurrence ( $M$ ;  $p=0.0002$ ; Fig. 4B) and the duration of the first epidemic wave ( $T$ ;  $p=0.0087$ ;  
240 Fig. 4C). The relation between the percentage of infections and GDP per capita showed rather global  
241 positive dependence (Fig. 4A), which means that the higher GDP per capita, the higher percentage of  
242 infections during the first epidemic wave. The relation between the time of peak occurrence and GDP  
243 per capita showed local negative dependence for countries where peak occurs late (above median; Fig.  
244 4B) which means that the very early occurrence of peak is rather not correlated with GDP per capita  
245 but in case when the peak does not occur early the higher GDP per capita, the earlier peak occurs. The  
246 similar relation was also observed for the relation between the duration of the infection wave and GDP  
247 per capita (Fig. 4C), i.e. the very short duration of the first epidemic wave is rather not correlated with  
248 GDP per capita but in case when the duration of the first epidemic wave is not short, the higher GDP  
249 per capita, the shorter first epidemic wave.

250 The results of the analysis of the associations between population density and  $M$ ,  $T$  and  $P_{inf}$   
251 parameters showed that the percentage of infections during the first epidemic wave in analyzed  
252 countries was dependent on the population density ( $p=0.0079$ ; Fig 4D), while the day of the peak  
253 occurrence and the duration of the first epidemic wave were not dependent on population density ( $T$ :  
254  $p=0.4243$ ; Fig. 4E;  $M$ :  $p=0.5924$ ; Fig. 4F). The relation between percentage of infections and  
255 population density showed local negative dependence (Fig. 4D) e.g. in case when population density is

256 not very high but the percentage of infections is rather high. In such case the higher population density  
257 the lower percentage of infections.

258

## 259 **Discussion**

260 The method presented in this paper gives an indication of the spread of the COVID-19 disease  
261 in particularly any country, which provides daily numbers of infected cases. Both the presented  
262 method and techniques employed are all straightforward, well known and easy to use, since Johnson  
263 CDF fitting is available in many statistical/calculus packages, e.g. R, Statistica, MATLAB, MS Excel.  
264 Using alternative method of fitting using moments instead of shape, location and scale parameters  
265 makes it easier to set starting points for numerical fitting (e.g. by visual analyzing the scatter plot of  
266 number of infected in time). Obtained curves are extremely well fitted, which was shown on the  
267 example of 80 different countries from 6 regions. Also, obtained parameters are easy to interpret and  
268 ready to use in further analysis, such as finding associations between them and other variables which  
269 may be associated with COVID-19 dynamics, i.e. GDP per capita, population density.

270 To date, some research used curve-fitting with a Normal distribution to answer the real time  
271 request and applied it to COVID-19 in Wuhan (Tomie 2020) since it was known that flu epidemic  
272 followed a Normal distribution, whereas other researchers noticed the COVID-19 profile has a feature  
273 to leave a trail in an asymmetric and applied a Lognormal distribution curve fitting (Nishimoto and  
274 Inoue 2020). The results presented in this paper showed, that in 79% of analyzed countries, first wave  
275 of infections were highly skewed, which suggest that unlike the flu, COVID-19 epidemic does not  
276 follow the normal distribution and should not be modelled in this manner. In such case log-normal  
277 distribution fitting seems to be better, however, as it was presented on the example of Afghanistan, the  
278 differences in  $R^2$  between Johnson, Normal and Lognormal CDFs seem to be small, but the difference  
279 is ca. 1 level of magnitude in favour of Johnson CDF. Moreover, one can see, that both Normal and  
280 Lognormal CDFs are fitted worse at the tails of the infection wave than Johnson CDF (Fig. 3B), and  
281 both showed lower number of infections than it was observed (raw data) and lower than obtained  
282 using Johnson CDF. Also, fitted Lognormal curve starts to increase later than Normal and Johnson  
283 distribution curves, which in consequence would led to incorrect estimation of the beginning of the  
284 wave (11 days later than it was obtained using Johnson distribution), whereas Normal distribution is  
285 far worse fitted at the right tail than Johnson and Lognormal distributions, because the wave of  
286 infections observed in Afghanistan was not symmetrical. Beside that using Normal distribution would  
287 unable estimating the true duration of the wave decrease (it is equal to the time of the wave increase by  
288 definition), it also leads to the much lower estimation of the day when the wave of infections ends (57  
289 days earlier than estimated using Johnson distribution), which is caused by "too fast" flattering of the  
290 Normal CDF (Fig. 3B). Extremely high  $R^2$  obtained for 80 analyzed countries (Supplementary  
291 Materials) suggest that Johnson curves class is flexible enough to almost perfectly follow the course of  
292 the epidemic in this countries. This results from the fact, that both skewness and kurtosis are estimated



293 parameters during Johnson curve fitting procedure, whereas the shape of other commonly used curves  
294 (Normal, Lognormal, Weibull) is more or less imposed. This result also suggests that Johnson  
295 distribution should be preferred in curve-fitting approach for COVID-19 data.

296 Presented curve fitting method was designed primarily to obtain easy in interpretation  
297 parameters describing past trajectory of COVID-19 infection, but parameters describing actually  
298 ongoing wave of infection, especially in its early stage (before the peak), may be interpreted as a  
299 forecast of future course of the pandemic. However, in such case, extreme caution is advised (see  
300 Jewell et al. 2020). Presented method is purely statistical model and it does not incorporate the process  
301 that produces the number of infections pattern, and does not account for any parameters governing  
302 transmission, disease, and immunity. Also, curve fitting techniques cannot predict the occurrence of  
303 future peaks. Thus, for long term prognosis and modelling the future scenarios of the pandemic, it is  
304 recommended to use more reliable methods, based on SEIR models. Nevertheless, some short term  
305 prognosis can be obtained using presented method, which may be useful for policymakers in rapid,  
306 short term intervention planning, however one must keep in mind the abovementioned limitations of  
307 presented method, as well as the limitations resulting from the data collecting and reporting, which are  
308 discussed later in this section.

309 The results obtained in the presented example of the application of parameters describing  
310 COVID-19 dynamics showed, that the higher the GDP per capita, the higher percentage of the  
311 population infected was observed. This is quite unexpected result, however consistent with the result  
312 which was very recently reported by Liu et al. (2020), who found the positive correlation between  
313 human development index (HDI) and risk of infections and deaths of COVID-19 in Italy. Other  
314 obtained results showed that, excluding countries where peak of infections occurred very early and its  
315 duration was short, the higher GDP per capita, the earlier peak occurs and the first epidemic wave is  
316 shorter. This result, in turn, is similar to another very recent paper, which reported that the date of first  
317 CoVID-19 cases co-varies positively with GDP across countries, most probably due to their more  
318 intensive participation of the global tourism and traffic industries (Jankowiak et al. 2020). The other  
319 example showed that the higher population density the lower the percentage of population infected  
320 during first wave of infections. This also seems to be unexpected, however, a negative dependence  
321 result from fact that the infections are presented as a percentage, which does not scale proportionally  
322 with the population density. Another possible explanation is that in countries with high population  
323 density (e.g. China, Singapore), very strict (full) lockdowns were immediately applied (China,  
324 Kretschmer and Yang, 2020; Singapore, Cheong 2020), which could result in lower percentages of  
325 infected population than in countries with lower population density, where partial lockdown or no  
326 lockdowns at all were applied. Moreover, some research report positive correlation between  
327 population density and number of infections and related mortality (e.g. in India; Bhadra et al., 2020),  
328 while other report no evidence that population density is linked with COVID-19 cases and deaths (e.g.  
329 in USA; Carozzi et al., 2020). Nevertheless, presented examples showed the usefulness of the

330 presented method, but also, the very recent papers of Liu et al. (2020) and Jankowiak et. al. (2020)  
331 showed that the field of research on COVID-19, other than purely epidemiological modelling of the  
332 future pandemic scenarios, is rising, which indicate that the simple methods of obtaining parameters  
333 describing the infection waves, such as presented in this paper, may be very useful and can help to  
334 deepen our understanding of the COVID-19 pandemic.

335 The last but not least issue which has to be addressed is a key limitation in understanding of  
336 the COVID-19 pandemic, that the true number of infections is not known and the only known  
337 infections are those confirmed by tests. Moreover, testing strategies differs between counties i.e. in  
338 some countries only symptomatic cases are tested, while in other mass testing is performed. Also,  
339 most COVID-19 cases are asymptomatic and remain unreported (Peirlinck et al. 2020). Because of  
340 that, mortality data are generally considered as more reliable than testing-dependent confirmed case  
341 counts and used in COVID-19 epidemic modelling (e.g. Chikobvu and Sigauke, 2020). However,  
342 some countries only report COVID-19 deaths occurring in hospitals, whereas other report COVID-19  
343 deaths when test has confirmed the infection (this makes number of death data testing-dependent as  
344 well). On the other hand, when laboratory diagnosis is not required (e.g. United Kingdom, UK  
345 Guidance), it is possible that other diseases reassembling COVID-19 symptoms may be reported as  
346 COVID-19 cause of death. It may also be difficult to evaluate the cause of death in cases, when patient  
347 had other disease (e.g. advanced stage of cancer) together with COVID-19. Taking all of the above  
348 into account, it is very likely that real number of deaths is also higher than the reported number of  
349 deaths, which was noticed in some countries (e.g. Italy, Foresti 2020, Stancati and Sylvers, 2020;  
350 China, Long et al., 2020). It seems that both confirmed new cases and confirmed deaths may not be  
351 reliable, but on the other hand, no other data is available. Some models (e.g. IHME 2020) are able to  
352 estimate true number of infections, but it is related to a number of additional assumptions, and is partly  
353 based on the reported testing-dependent data. Also, the relation between true number of infections and  
354 number of death is not well studied to date and require a number of assumptions. Using the number of  
355 infections seems to be the easiest way of obtaining basic data on the COVID-19 infection dynamics in  
356 a given country, as long as one is aware that publicly shared data show number of confirmed cases  
357 instead of number of real infections and takes this into account when interpreting the results.

358 In conclusion, presented method based on Johnson CDF curve fitting to the cumulative  
359 number of confirmed cases is straight forward, well known and easy to use. It provides curves which  
360 are extremely well fitted to the data, and obtained basic parameters of COVID-19 infection dynamics  
361 are easy to interpret and to use in further statistical analysis by researchers from other fields than  
362 epidemiology (e.g. sociology, biology, ecology, etc.), and can deepen our understanding of the  
363 COVID-19 pandemic. It also may be useful in short term prognosis, however, in such case caution is  
364 advised.

365

366 **Acknowledgements**

367 Both authors equally contributed to the study and are listed alphabetically. This study was financed  
368 partly by the statutory funds of the Institute of Nature Conservation, Polish Academy of Sciences and  
369 partly by the statutory funds of the Faculty of Applied Mathematics, AGH University of Science and  
370 Technology. We thank Magdalena Lenda and Piotr Skórka for their useful comments and suggestions.

371

## 372 **References**

- 373 Bhadra, A., Mukherjee, A., Sarkar, K. 2020. Impact of population density on Covid-19 infected and  
374 mortality rate in India. *Modeling Earth Systems and Environment*. [https://doi.org/10.1007/s40808-](https://doi.org/10.1007/s40808-020-00984-7)  
375 [020-00984-7](https://doi.org/10.1007/s40808-020-00984-7)
- 376 Carozzi F., Provenzano S., Roth S. 2020. Urban density and COVID-19, discussion paper series, IZA  
377 Institute of Labor economics, IZA DP No. 13440.
- 378 Cheong D. 2020. Coronavirus: Most workplaces to close, schools will move to full home-based  
379 learning from next week, says PM Lee. *The Straits Times*. Singapore. 3 April 2020. Accessed at  
380 [https://www.straitstimes.com/singapore/health/most-workplaces-to-close-schools-will-move-to-](https://www.straitstimes.com/singapore/health/most-workplaces-to-close-schools-will-move-to-full-home-based-learning-from-next)  
381 [full-home-based-learning-from-next](https://www.straitstimes.com/singapore/health/most-workplaces-to-close-schools-will-move-to-full-home-based-learning-from-next) on 29 November 2020.
- 382 Chikobvu D., Sigauke C. 2020. Statistical distribution fitting to the number of COVID-19 deaths in  
383 South Africa. Preprint, DOI: 10.21203/rs.3.rs-32411/v1
- 384 Ćmiel B., Ledwina T. 2020. Validation of association. *Insurance: Mathematics and Economics* 91: 55-  
385 67. <https://doi.org/10.1016/j.insmatheco.2019.12.003>
- 386 Johnson, N. L. 1949. Systems of Frequency Curves Generated by Methods of translation.  
387 *Biometrika* 36: 149–176.
- 388 Ducharme J. 2020. The WHO Just Declared Coronavirus COVID-19 a Pandemic. *Time*  
389 2020;11 March 2020. Accessed at [https://time.com/5791661/who-coronavirus-pandemic-](https://time.com/5791661/who-coronavirus-pandemic-declaration/)  
390 [declaration/](https://time.com/5791661/who-coronavirus-pandemic-declaration/) on 28 November 2020.
- 391 Ferguson N.M., Laydon D., Nedjati-Gilani G., Imai N., Ainslie K., Baguelin M., Bhatia S., Boonyasiri  
392 A., Cucunubá Z., Cuomo-Dannenburg G., Dighe A., Dorigatti I., Fu H., Gaythorpe K., Green W.,  
393 Hamlet A., Hinsley W., Okell L.C., van Elsland S., Thompson H., Verity R., Volz E., Wang H.,  
394 Wang Y., Walker P.G.T, Walters C., Winskill P., Whittaker C., Donnelly C.A., Riley S., Ghani  
395 A.C. Report 9: Impact of non-pharmaceutical interventions (NPIs) to reduce COVID-19 mortality  
396 and healthcare demand. Imperial College COVID-19 Response Team. Accessed at  
397 <https://doi.org/10.25561/77482> on 29 November 2020.
- 398 Foresti C.C.L. 2020. The real death toll for Covid-19 is at least 4 times the official numbers. *Corriere*  
399 *Della Serra*. 26 March 2020. Accessed at [www.corriere.it/politica/20\\_marzo\\_26/the-real-death-toll-](http://www.corriere.it/politica/20_marzo_26/the-real-death-toll-for-covid-19-is-at-least-4-times-the-official-numbers-b5af0edc-6eeb-11ea-925b-a0c3cdb1130.shtml?refresh_ce-cp)  
400 [for-covid-19-is-at-least-4-times-the-official-numbers-b5af0edc-6eeb-11ea-925b-](http://www.corriere.it/politica/20_marzo_26/the-real-death-toll-for-covid-19-is-at-least-4-times-the-official-numbers-b5af0edc-6eeb-11ea-925b-a0c3cdb1130.shtml?refresh_ce-cp)  
401 [a0c3cdb1130.shtml?refresh\\_ce-cp](http://www.corriere.it/politica/20_marzo_26/the-real-death-toll-for-covid-19-is-at-least-4-times-the-official-numbers-b5af0edc-6eeb-11ea-925b-a0c3cdb1130.shtml?refresh_ce-cp) on 28 November 2020.
- 402 Hahn G.J., Shapiro S.S. 1967. *Statistical Models in Engineering*. Wiley series on systems engineering  
403 and analysis, Wiley, ISSN 0084-019X, pp. 199-220.

- 404 Hasell J., Mathieu E., Beltekian D., Macdonald B., Giattino C., Ortiz-Ospina E., Roser M., Ritchie H.  
405 2020. A cross-country database of COVID-19 testing. *Scientific Data* 7,  
406 345. <https://doi.org/10.1038/s41597-020-00688-8>
- 407 Hellewell J., Abbott S., Gimma A., Bosse N.I., Jarvis C.I., Russell T.W., Munday J.D., Kucharski  
408 A.J., Edmunds J., Sun F., Flasche S., Quilty B.J., Davies N., Liu Y., Clifford S., Klepac P., Jit M.,  
409 Diamond C., Gibbs H., van Zandvoort K., Funk S., Eggo R.M. 2020. Feasibility of  
410 controlling COVID-19 outbreaks by isolation of cases and contacts. *The Lancet Global Health*,  
411 8:e488-e496. [https://doi.org/10.1016/S2214-109X\(20\)30074-7](https://doi.org/10.1016/S2214-109X(20)30074-7).
- 412 Hethcote H.W. The mathematics of infectious diseases. *SIAM Review*, 42: 599-653
- 413 Hill I.D., Hill R., Holder R.L. 1976. Algorithm AS 99: Fitting Johnson Curves by Moments. *Applied*  
414 *Statistics* 25: 180-189. <https://doi.org/10.2307/2346692>
- 415 Holmdahl S.M., Buckee C. 2020. Wrong but Useful — What Covid-19 Epidemiologic Models Can  
416 and Cannot Tell Us. *The New England Journal of Medicine*, 383:303-305.  
417 DOI:10.1056/NEJMp2016822
- 418 IHME. 2020. Institute for Health Metrics and Evaluation COVID-19 Projections. Accessed at  
419 <https://covid19.healthdata.org> on 29 November 2020.
- 420 Jankowiak Ł., Rozsa L., Tryjanowski P., Møller A.P. 2020. Strong negative covariation between  
421 toxoplasmosis and CoVID-19 at a global scale: a spurious indirect effect? *Scientific Reports* 10:  
422 12512 (2020). <https://doi.org/10.1038/s41598-020-69351-x>
- 423 Jewell N.P., Lewnard J.A., Jewell B.L. 2020. Caution Warranted: Using the Institute for Health  
424 Metrics and Evaluation Model for Predicting the Course of the COVID-19. *Annals of Internal*  
425 *Medicine*, 173: 226-227. <https://doi.org/10.7326/M20-1565>
- 426 Kissler S.M., Tedijanto C., Goldstein E., Grad Y.H., Lipsitch M. 2020. Projecting the transmission  
427 dynamics of SARS-CoV-2 through the postpandemic period. *Science* 22 May 2020: Vol. 368,  
428 Issue 6493, pp. 860-868 DOI: 10.1126/science.abb5793
- 429 Kretschmer F., Yang W. 2020. Wuhan lockdown: China takes extreme measures to stop virus spread..  
430 Deutsche Welle. 23 January 2020. Accessed at [https://www.dw.com/en/wuhan-lockdown-china-](https://www.dw.com/en/wuhan-lockdown-china-takes-extreme-measures-to-stop-virus-spread/a-52120126)  
431 [takes-extreme-measures-to-stop-virus-spread/a-52120126](https://www.dw.com/en/wuhan-lockdown-china-takes-extreme-measures-to-stop-virus-spread/a-52120126) on 29 November 2020.
- 432 Kuhl E. 2020. Data-driven modeling of COVID-19—Lessons learned. *Extreme Mechanics*  
433 *Letters* 40,100921. <https://doi.org/10.1016/j.eml.2020.100921>
- 434 LANL. 2020. Los Alamos National Laboratory COVID-19 Cases and Deaths Forecasts. Accessed at  
435 <https://covid-19.bsvgateway.org>. on 28 November 2020.
- 436 Liu K., He M., Zhuang Z., He D., Li H. 2020. Unexpected positive correlation between human  
437 development index and risk of infections and deaths of COVID-19 in Italy. *One Health*, 10:  
438 100174. <https://doi.org/10.1016/j.onehlt.2020.100174>.

- 439 Long Q., Siu-fung L., Mudie L. Estimates Show Wuhan Death Toll Far Higher Than Official Figure.  
440 Radio Free Asia. 27 March 2020. Accessed at [www.rfa.org/english/news/china/wuhan-deaths-](http://www.rfa.org/english/news/china/wuhan-deaths-03272020182846.html)  
441 [03272020182846.html](http://www.rfa.org/english/news/china/wuhan-deaths-03272020182846.html). on 28 November 2020.
- 442 Moré J.J. 1978. The Levenberg-Marquardt algorithm: Implementation and theory. In: Watson G.A.  
443 (ed.) Numerical Analysis. Lecture Notes in Mathematics, 630. Springer, Berlin, Heidelberg.
- 444 Nishimoto Y., Inoue K. Curve-fitting approach for COVID-19 data and its physical background.  
445 medRxiv 2020.07.02.20144899. doi: <https://doi.org/10.1101/2020.07.02.20144899>
- 446 Peirlinck M., Linka K., Costabal F.S., Bhattacharya j., Bendavid E., Ioannidis J.P.A., Kuhl E.  
447 2020. Visualizing the invisible: The effect of asymptomatic transmission on the outbreak dynamics  
448 of COVID-19. Computer Methods in Applied Mechanics and Engineering 372: 113410.
- 449 Skórka P., Grzywacz B., Moroń D., Lenda M. 2020. The macroecology of the COVID-19 pandemic in  
450 the Anthropocene. PLoS ONE 15:e0236856. <https://doi.org/10.1371/journal.pone.0236856>
- 451 Stancati M., Sylvers E. 2020. Italy's Coronavirus Death Toll Is Far Higher Than Reported. The Wall  
452 Street Journal. 1 April 2020. Accessed at [www.wsj.com/articles/italys-coronavirus-death-toll-is-](http://www.wsj.com/articles/italys-coronavirus-death-toll-is-far-higher-than-reported-11585767179)  
453 [far-higher-than-reported-11585767179](http://www.wsj.com/articles/italys-coronavirus-death-toll-is-far-higher-than-reported-11585767179). on 28 November 2020.
- 454 Tomie T. Understanding the present status and forecasting of COVID—19 in Wuhan. medRxiv  
455 2020.02.14. <https://doi.org/10.1101/2020.02.13.20022251>
- 456 UGSDSC. 2020. University of Geneva and Swiss Data Science Center COVID-19 Daily Epidemic  
457 Forecasting. <https://renkulab.shinyapps.io/COVID-19-Epidemic-Forecasting>
- 458 UK Guidance. Guidance for doctors completing Medical Certificates of Cause of Death in England  
459 and Wales. HM Passport Office, Office fir National Statistics. Accessed at  
460 [https://assets.publishing.service.gov.uk/government/uploads/system/uploads/attachment\\_data/file/8](https://assets.publishing.service.gov.uk/government/uploads/system/uploads/attachment_data/file/877302/guidance-for-doctors-completing-medical-certificates-of-cause-of-death-covid-19.pdf)  
461 [77302/guidance-for-doctors-completing-medical-certificates-of-cause-of-death-covid-19.pdf](https://assets.publishing.service.gov.uk/government/uploads/system/uploads/attachment_data/file/877302/guidance-for-doctors-completing-medical-certificates-of-cause-of-death-covid-19.pdf). on 28  
462 November 2020.
- 463 WHO 2020. World Health Organization Coronavirus Disease (COVID-19) Dashboard. Accessed at  
464 <https://covid19.who.int/> on 4 December 2020.
- 465

466

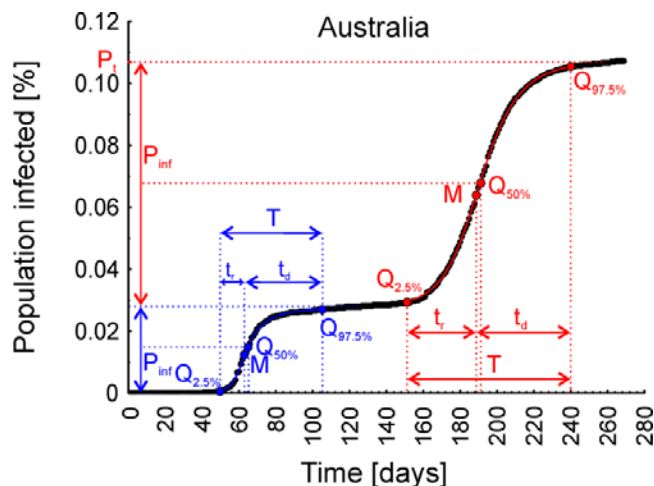

467

468 Figure 1. Graphical presentation of the interpretation of the obtained parameters from Johnson  
469 Cumulative Distribution Function fitting, describing the dynamics of the two infection waves observed  
470 in Australia.  $P_{inf}$  indicate the total percentage of infections in a given infection wave,  $Q_{2.5\%}$  indicate  
471 the day when the infection wave starts,  $Q_{97.5\%}$  indicate the day when the infection wave ends  $Q_{50\%}$   
472 indicate the day when the half of the total percentage of infected during a given wave was reached,  $M$   
473 indicate the day of the peak occurrence,  $T$  indicate the wave duration,  $t_i$  indicate the duration of the  
474 wave increase,  $t_d$  indicate the duration of the wave decrease,  $P_i$  indicate the total percentage of  
475 population infected after two waves of infections.

476



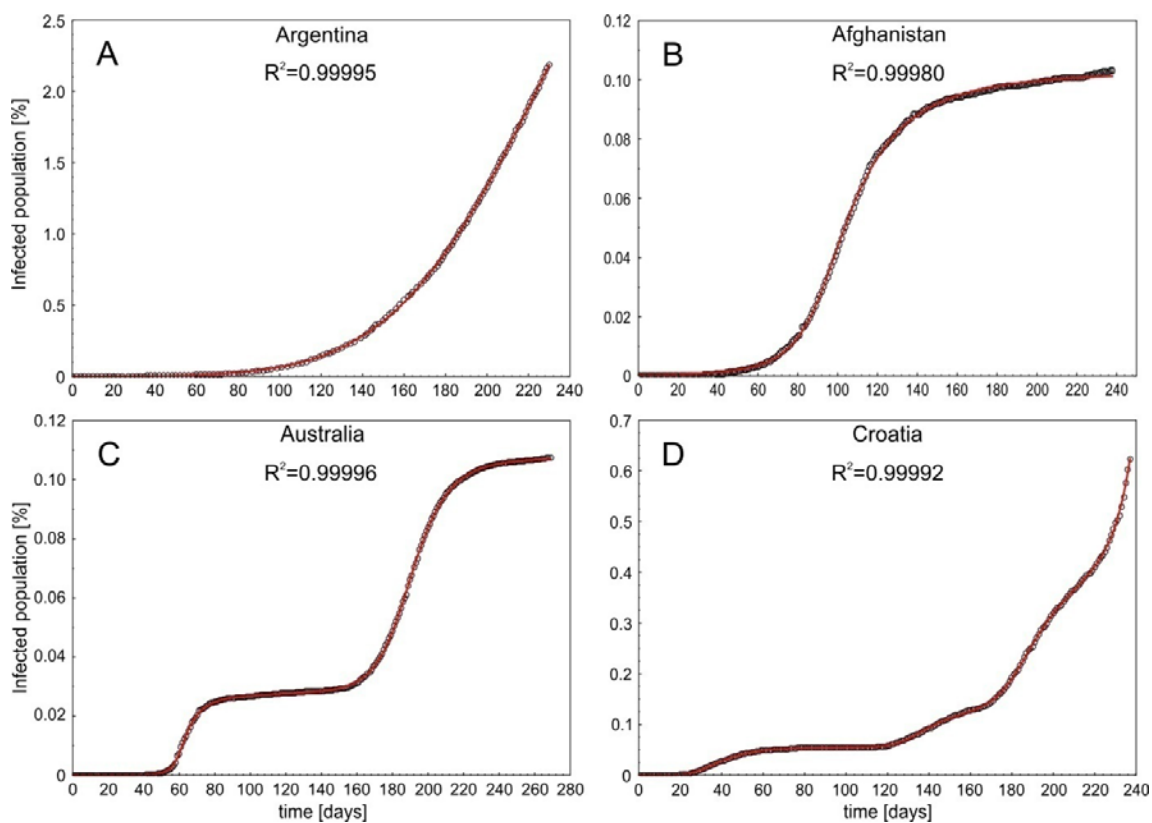

477

478 Fig. 2. Examples of fitted distributions in four scenarios of COVID-19 infection dynamics. A - one  
479 ongoing infection wave (before the peak), B - full one wave, C - two waves and D - four overlapping  
480 and interfering waves. Open dots indicate raw data, red lined indicate fitted Johnson Cumulative  
481 Distribution Functions.

482

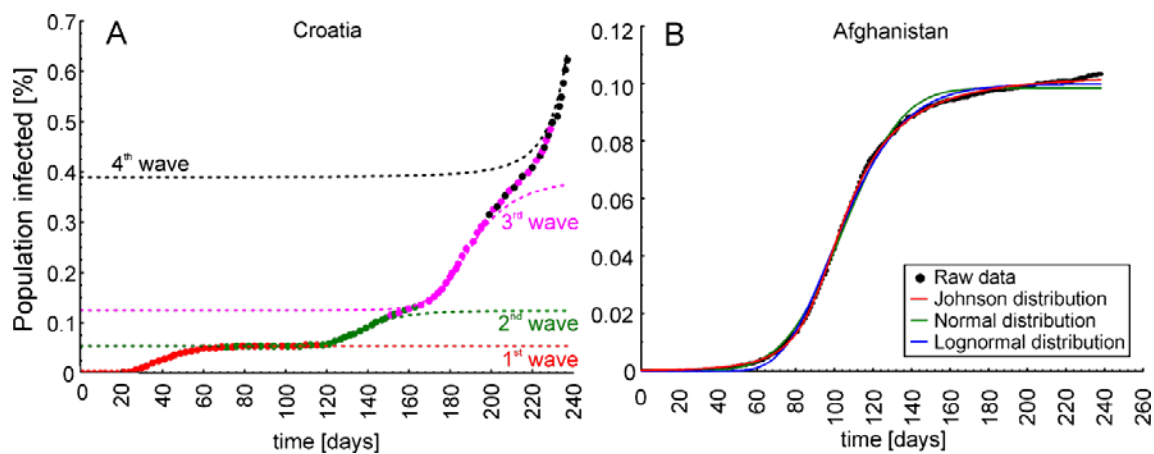

483  
484 Fig. 3.A - the trajectory of four Johnson Cumulative Distribution Functions fitted to the four waves of  
485 infections observed in Croatia, with areas where waves are overlapping and interfering. B - the  
486 differences between fitted Johnson (red line) Normal (green line) and Lognormal Cumulative  
487 Distribution Functions to the raw data from Afghanistan (black dots).

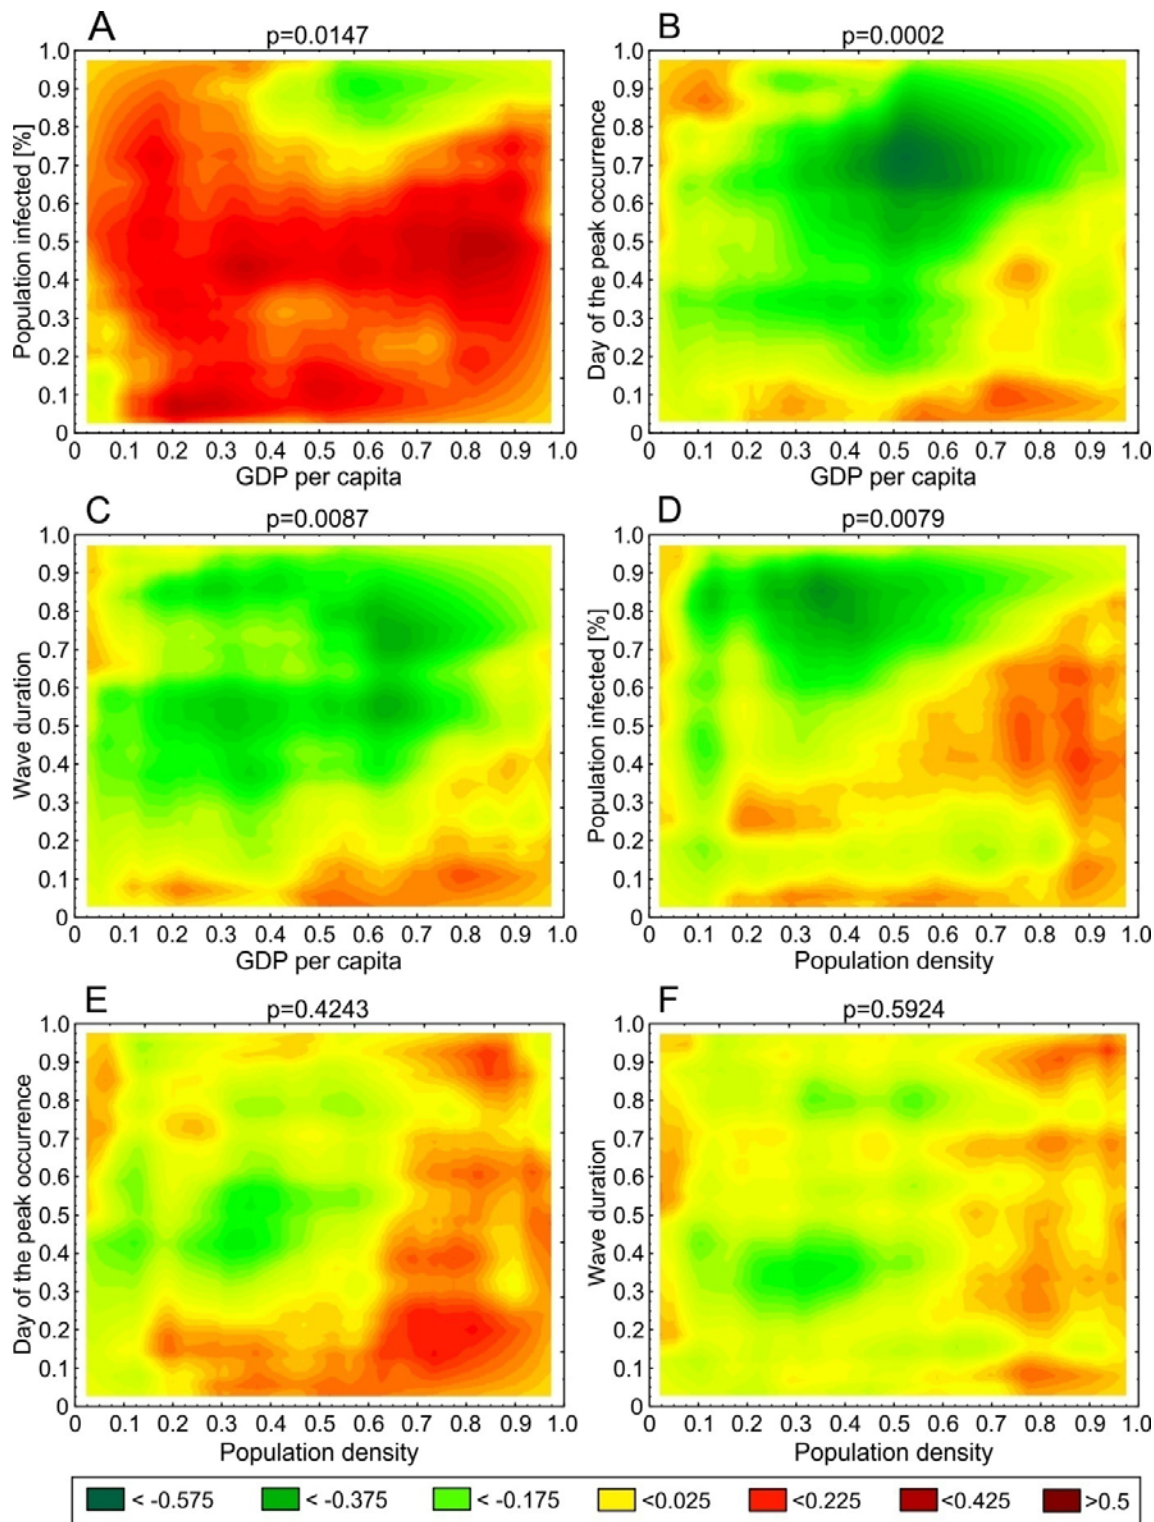

488

489 Fig. 4. Heat maps showing the local association structure between variables at different quantile levels

490 obtained using quantile dependence function  $q$ .
